# Supplementary material for: Comparative Metabolomics Analysis Reveals Sterols and Sphingolipids Play a Role in Cotton Fiber Cell Initiation
Source: MDPI journal article supplement (doi:10.3390/ijms222111438), 2021-10-23
Supplement: s1 [file s1]

Table S1. The sequence of primer used to detect expression level in RT-qPCR

| gene       | primer     | sequence(5'-3')        |
|------------|------------|------------------------|
| GhGCS2680  | GCS2680-1  | GGCACCTAAGCTCTCACTTG   |
|            | GCS2680-2  | CTTTGGGAGTGGCTGCTTTC   |
| GhGCS7060  | GCS7060-1  | TATCTCTGCCTTCCGATCTC   |
|            | GCS7060-2  | TAATCCCACCACCAACCAAC   |
| GhGCS2810  | GCS2810-1  | TTGTCTGTGTTTGGTCGATC   |
|            | GCS2810-2  | CCGTGGTAGATTGACCTGAT   |
| GhGCS7230  | GCS7230-1  | GGCACCTAAGCTCTCACTTG   |
|            | GCS7230-2  | CCTCTCTCTGCTAAACCTCG   |
| GhIPCS1    | IPCS1-1    | CGCTTTACATTGGTCGCGAAGC |
|            | IPCS1-2    | GAACTCCTCGAGCAGCTACACC |
| GhIPCS2    | IPCS2-1    | TTGGTGCAGGGTGCTAGCATTT |
|            | IPCS2-2    | CTAGCACACTCTCCGGTTTCGG |
| GhIPCS7    | IPCS7-1    | CCGAGAGGGTTCTAAGCTTGCC |
|            | IPCS7-2    | GTGAGCACAAAGACCAGGGTGA |
| GhIPCS8    | IPCS8-1    | ATGGTCTAGCTGCCCATGGAGT |
|            | IPCS8-2    | AATGCTAGCACCTGCACCAAA  |
| GhCYP710A1 | CYP710A1-1 | GAAGCACCGAACTTTCCCACT  |
|            | CYP710A1-2 | GAGTAGCACAATCACCAAGGG  |
| GhCYP710A2 | CYP710A2-1 | CACCTTATCTTCGCTAACGTC  |
|            | CYP710A2-2 | AGCACAATCACCAAGGGTTTC  |
| GhPSAT1    | PSAT1-1    | TTGAGGAGCGAGACCTTTAC   |
|            | PSAT1-2    | TGAACCAAGAAGAGGAGCTC   |
| GhHMGR1    | HMGR1-1    | GGATGTCATTGGCATCTCTGG  |
|            | HMGR1-2    | TGATGCAATGCGAGCTCTCGA  |
| GhCPI1     | CPI1-1     | GAACGATGTACCACACACGAC  |
|            | CPI1-2     | GGGTTTCTCGTCAATCCTGAG  |
| GhSMT1     | SMT1-1     | GGTCTTCCGGATATCAGGTTG  |
|            | SMT1-2     | ACTTCCCTTGGGAGCTAATCC  |
| GhSMT2     | SMT2-1     | CGATCAACGATTACCAAGTG   |
|            | SMT2-2     | AGTAACAAGAGGTGGAACACA  |
| GhDWF1     | DWF1-1     | GCTCAAGGCTACTCAAGGTG   |
|            | DWF1-2     | CTCCGACACTGCATACTGTG   |
| GhHIS3     | HIS3-up    | GAAGCCTCATCGATACCGTC   |
|            | HIS3-dn    | CTACCACTACCATCATGGC    |
